# Supplementary material
Source: Royal Society of Chemistry journal article supplement (doi:10.1039/d6su00113k)
Supplement: d6su00113k1.pdf [file d6su00113k1.pdf]

## Sustainable air plasma regeneration of screen-printed gold electrodes with enhanced electroactive surface area and biosensing performance

Sina Ardalan<sup>\*a</sup>, Clara T. H. Tran<sup>b</sup>, Stuart T. Fraser<sup>b,c</sup>, Marcela M. M. Bilek<sup>b,d</sup>, Anna Ignaszak<sup>\*a,e</sup>

<sup>a</sup>Department of Chemistry, University of New Brunswick, Fredericton, Canada

<sup>b</sup>School of Biomedical Engineering, J03, The University of Sydney, NSW 2008, Australia

<sup>c</sup>Culturon Pty Ltd, Newtown, 2042, NSW, Australia

<sup>d</sup>School of Physics, A28, The University of Sydney, NSW 2006, Australia

<sup>e</sup>Department of Chemistry, Brock University, St. Catharines, Canada

† Email: [sina.ardalan@unb.ca](mailto:sina.ardalan@unb.ca), [aignaszak@brocku.ca](mailto:aignaszak@brocku.ca)

### Table of Contents

|                                                                                                                                                                                                                                                                     |    |
|---------------------------------------------------------------------------------------------------------------------------------------------------------------------------------------------------------------------------------------------------------------------|----|
| Fig. S1. Schematics and the image of the incubation chamber designed in Autodesk Tinkercad . (A) Front view, (B) Top view, and (C) image of the incubation chamber with a gold SPE sandwiched between the Perspex layers, tightly sealed by neodymium magnets. .... | 3  |
| Fig. S2. Cyclic voltammograms of A) E-polished and B) plasma cleaned/E-polished gold SPE in the measurement buffer solution at scan rates 25–150 mV/s vs pseudo-Ag/AgCl paste. ....                                                                                 | 4  |
| Fig. S3. Cyclic voltammograms of a gold SPE in TBS 1X and ferro/ferricyanide 2 mM after each cycle of plasma cleaning. ....                                                                                                                                         | 5  |
| Table. S1. Electrochemical characteristics of a new (untreated), used, and plasma cleaned gold SPE showcasing the improved electrochemical performance and higher surface area via air plasma cleaning. ....                                                        | 5  |
| Table. S2. Comparison of plasma treatment parameters of this work with preViously published studies. ....                                                                                                                                                           | 6  |
| Table. S3. Fixed parameter values for the Randel-SeVcik and Warburg impedance equations for diffusion calculations. ....                                                                                                                                            | 7  |
| Table. S4. The oxidation peak currents for electrodes treated under two conditions were measured at stepwise increasing scan rates during cyclic voltammetry tests. ....                                                                                            | 8  |
| Table. S5. Warburg Impedance coefficient ( $\sigma$ ) derived from faradaic EIS tests for electrodes treated under two conditions. ....                                                                                                                             | 9  |
| Table. S6. Peak binding energy (BE) comparison form XPS analysis of gold SPE in this work with preViously published studies. ....                                                                                                                                   | 10 |

## List of Abbreviation

| <b>Abbreviation</b> | <b>Full Form</b>                       |
|---------------------|----------------------------------------|
| AFM                 | Atomic force microscopy                |
| $C_{dl}$            | Double layer capacitance               |
| CPE                 | Constant phase element                 |
| CV                  | Cyclic voltammetry                     |
| ssDNA               | Single strand deoxyribonucleic acid    |
| EIS                 | Electrochemical impedance spectroscopy |
| E-Polish            | Electropolish                          |
| MCH                 | Mercaptohexanol                        |
| OCP                 | Open circuit potential                 |
| POC                 | Point of care                          |
| $R_{ct}$            | Charge transfer resistance             |
| RF                  | Radio frequency                        |
| RSD                 | Relative standard deviation            |
| $R_u$               | Uncompensated resistance               |
| SAM                 | Self assemble monolayer                |
| SEM                 | Scanning electron microscope           |
| SPE                 | Screen printed electrode               |
| TBA                 | Thrombin binding aptamer               |
| TBS                 | Tris buffer saline                     |
| WCA                 | Water contact angle                    |
| XPS                 | X-ray photoelectron spectroscopy       |
| $Z_w$               | Warburg impedance                      |

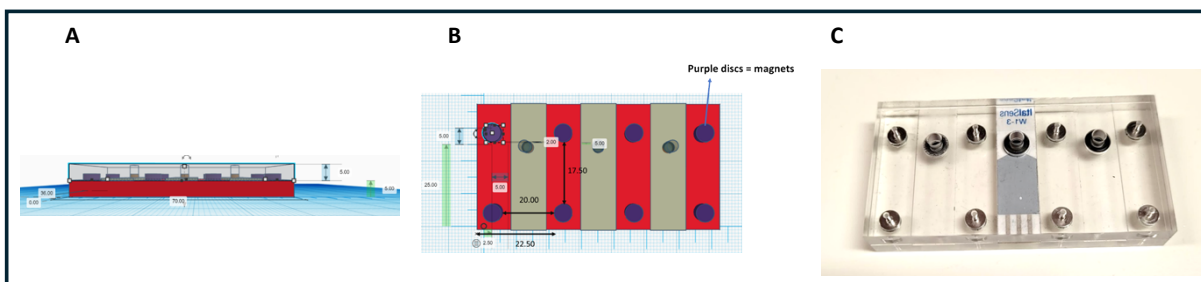

Fig. S1. Schematics and the image of the incubation chamber designed in Autodesk Tinkercad . (A) Front view, (B) Top view, and (C) image of the incubation chamber with a gold SPE sandwiched between the Perspex layers, tightly sealed by neodymium magnets.

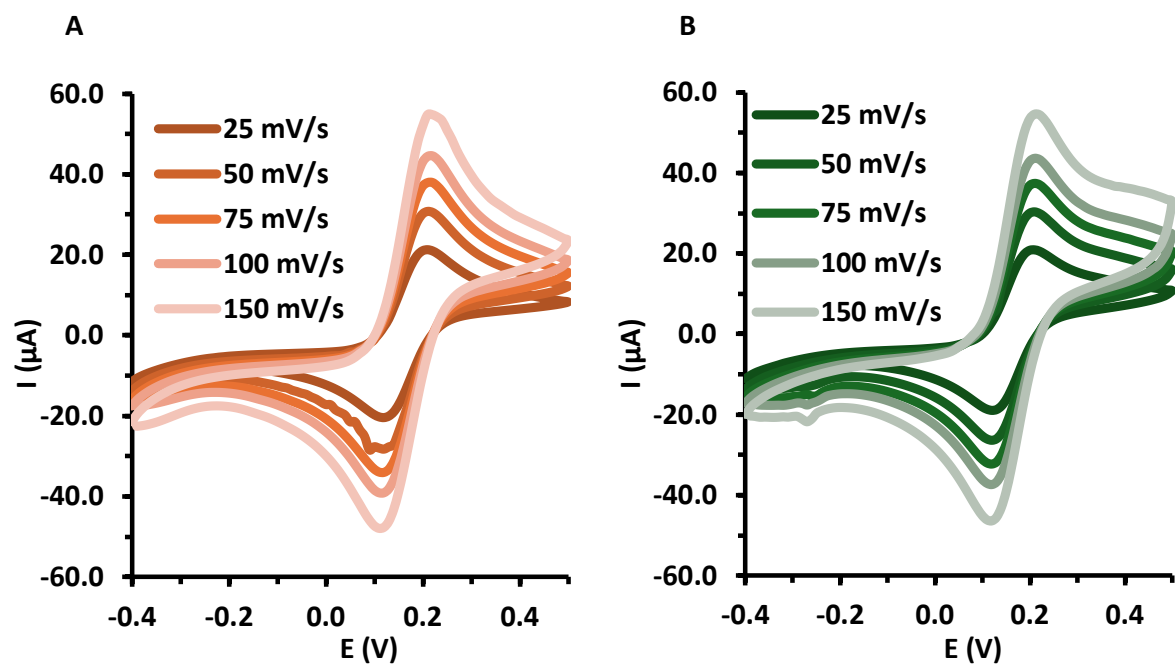

Fig. S2. Cyclic voltammograms of A) E-polished and B) plasma cleaned/E-polished gold SPE in the measurement buffer solution at scan rates 25–150 mV/s vs pseudo-Ag/AgCl paste.

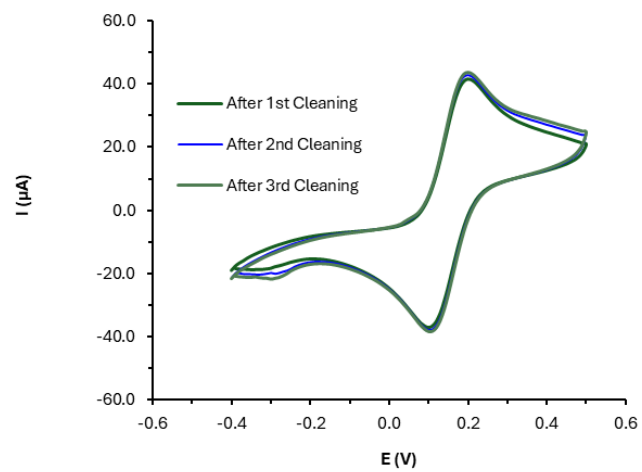

Fig. S3. Cyclic voltammograms of a gold SPE in TBS 1X and ferro/ferricyanide 2 mM after each cycle of plasma cleaning.

Table. S1. Electrochemical characteristics of a new (untreated), used, and plasma cleaned gold SPE showcasing the improved electrochemical performance and higher surface area via air plasma cleaning.

| Parameters                          | New  | Used | Plasma cleaned |
|-------------------------------------|------|------|----------------|
| $I_{\text{peak}}$ ( $\mu\text{A}$ ) | 49.5 | 6.8  | 77.4           |
| $\Delta E_{\text{peak}}$ (V)        | 0.18 | 0.47 | 0.11           |
| $S_{\text{true}}$ ( $\text{cm}^2$ ) | 0.21 | 0.15 | 0.26           |
| $R_{\text{ct}}$ ( $\Omega$ )        | 1.1  | 6.1  | 0.43           |
| $C_{\text{dl}}$ ( $\mu\text{F}$ )   | 1.3  | 0.64 | 3.2            |

Table. S2. Comparison of plasma treatment parameters of this work with previously published studies.

| System                                            | Plasma Power                      | Sample Size                    | Pressure    | Time               | Application              | Advantage                                                                        | Limitation                    |
|---------------------------------------------------|-----------------------------------|--------------------------------|-------------|--------------------|--------------------------|----------------------------------------------------------------------------------|-------------------------------|
| RF discharge air plasma, (this work)              | 30 W<br>~10<br>mW/cm <sup>3</sup> | Substrate 15.2 cm x 16.5 cm    | 0.7 Torr    | 10 min             | Recycling, pre-treatment | Cleans multiple electrodes simultaneously, simple operation, at least 3 recycles | Initial high cost             |
| arc-discharge air-plasma generator <sup>9</sup>   | 12.9 W                            | Localized 0.11 cm <sup>2</sup> | atmospheric | 15 s per electrode | Pre-treatment            | No pump is required, rapid treatment                                             | Require manual assembly       |
| Plasma pen <sup>3</sup>                           | NA                                | Localized                      | atmospheric | 2 min              | Pre-treatment            | No pump is required                                                              | Dependence on operator skills |
| radiofrequency argon flow discharge <sup>10</sup> | 50-300 W                          | Substrate 10 cm diameter       | 0.67-6.65Pa | 2-15 min           | Pre-treatment            | Improved electron transfer kinetics                                              | High power consumption        |

Table. S3. Fixed parameter values for the Randel-Sevcik and Warburg impedance equations for diffusion calculations.

| <b>Parameter</b>            | <b>Value</b>       |
|-----------------------------|--------------------|
| A (cm <sup>2</sup> )        | 0.21               |
| C<br>(mol/cm <sup>3</sup> ) | 2×10 <sup>-6</sup> |
| n                           | 1                  |
| R (J/mol.K)                 | 8.314              |
| F C/mol                     | 96,485             |
| Constant                    | 0.446              |
| T (K)                       | 295                |

Table. S4. Warburg Impedance coefficient ( $\sigma$ ) derived from faradaic EIS tests for electrodes treated under two conditions.

| <b>Parameter</b>                     | <b>E-polished</b> | <b>Plasma cleaned/E-polished</b> |
|--------------------------------------|-------------------|----------------------------------|
| $\sigma$ ( $\Omega \cdot s^{-1/2}$ ) | 1071              | 1461                             |

Table. S5. The oxidation peak currents for electrodes treated under two conditions were measured at stepwise increasing scan rates during cyclic voltammetry tests.

| $v^{1/2}$<br>(V/s) | <b>E-<br/>polished</b>        | <b>Plasma cleaned/E-polished</b> |
|--------------------|-------------------------------|----------------------------------|
|                    | <b>ip (<math>\mu</math>A)</b> | <b>ip (<math>\mu</math>A)</b>    |
| 0.025              | 23.839                        | 22.039                           |
| 0.050              | 33.619                        | 29.553                           |
| 0.075              | 41.035                        | 37.823                           |
| 0.100              | 47.518                        | 43.696                           |
| 0.150              | 58.814                        | 53.784                           |

Table. S6. Peak binding energy (BE) comparison form XPS analysis of gold SPE in this work with previously published studies.

| Element             | Peak BE (This work)         | Peak BE (Reference)                                                                                                                                                      |
|---------------------|-----------------------------|--------------------------------------------------------------------------------------------------------------------------------------------------------------------------|
| Au4f <sub>7/2</sub> | Used: 84.02 eV              | Chromium and gold on glass substrate: 83.95 eV <sup>4</sup><br>Gold nanoparticles supported on oxides: 84.00 eV <sup>5</sup><br>Spin-orbit coupling: 3.7 eV <sup>5</sup> |
|                     | New: 84.49 eV               |                                                                                                                                                                          |
|                     | Plasma cleaned: 84.18 eV    |                                                                                                                                                                          |
|                     | Spin-orbit coupling: 3.7 eV |                                                                                                                                                                          |
| C1s                 | Used: 285.04 eV             | sp <sup>2</sup> C=C (284 eV), sp <sup>3</sup> C-C (285 eV), and C-OH (286.88 eV) <sup>6</sup>                                                                            |
|                     | New: 284.89 eV              |                                                                                                                                                                          |
|                     | Plasma cleaned: 285.08 eV   |                                                                                                                                                                          |
| N1s                 | Used: 400.34 eV             | Common organic nitrogen species: 399- 400.6 eV <sup>8</sup><br>C-NH2: 400 eV <sup>7, 8</sup>                                                                             |
|                     | New: 400.29 eV              |                                                                                                                                                                          |
|                     | Plasma cleaned: 400.08 eV   |                                                                                                                                                                          |
| O1s                 | Used: 532.14 eV             | Common organic oxygen species 532.0 - 533.7 eV <sup>6</sup>                                                                                                              |
|                     | New: 532.29 eV              |                                                                                                                                                                          |
|                     | Plasma cleaned: 532.58 eV   |                                                                                                                                                                          |
